# Supplementary material for: A Sensitive Immunodetection Assay Using Antibodies Specific to Staphylococcal Enterotoxin B Produced by Baculovirus Expression
Source: MDPI journal article supplement (doi:10.3390/bios12100787), 2022-09-24
Supplement: s1 [file s1]

Supplementary Figure legends

| Parental SEB gene                                         | Codon-optimized SEB gene                                                                                                                                                                                                                                                                                                                                                                                                                                                                                                                                                                                                                                                                                                                                                     |
|-----------------------------------------------------------|------------------------------------------------------------------------------------------------------------------------------------------------------------------------------------------------------------------------------------------------------------------------------------------------------------------------------------------------------------------------------------------------------------------------------------------------------------------------------------------------------------------------------------------------------------------------------------------------------------------------------------------------------------------------------------------------------------------------------------------------------------------------------|
| Staphylococcus aureus<br>endotoxin B<br>(GenBank: M11118) | GAGTCCCAGCCTGATCCTAAGCCTGACGAGCTGCACAAGTCCTCAAGTTCACCGGCCTGATGGAAAACATGAAGGTGCTGTACGA<br>CGACAACCACGTGTCGCTATCAACGTGAAGTCTATCGACCAGTTCCTGTACTTCGACCTGATCTACTCCATCAAGGACACCAAGCT<br>GGGCAACTACGACAACGTGCGTGTGAGTTCAAGAACAAGGACCTGGCTGACAAGTACAAGGACAAATACGTGGACGTGTTTCGGC<br>GCCAACTACTACTACCAAGTGCTACTTCTCCAAAAAGACCAACGACATCAACTCCCACCAGACCGACAAGCGCAAGACCTGTATGTAC<br>GGTGGTGTACCCGAGCACAACGGCAACCAGCTGGACAAGTACCGTTCCATCACCCTGCGTGTGTTTCGAGGACGGCAAGAACCTGC<br>TGTCTTCGACGTGCAGACCAACAAGAAGAAAGTCACCGCTCAAGAGCTGGACTACCTGACCAGGCACTACCTCGTGAAGAACAAG<br>AAGCTGTACGAGTTCAACAACTCGCCCTACGAGACTGGCTACATCAAGTTTATCGAGAACGAGAACTCCTTTTGGTACGACATGATG<br>CCCGCTCCAGGCGACAAGTTCGACCAGTCCAAGTACCTGATGATGTACAACGATAACAAGATGGTGGACTCCAAGGACGTGAAGAT<br>CGAGGTGTACCTCACCACCAAGAAAAAG |

**Figure S1. SEB gene sequence used for baculovirus expression vector system.**  
*Staphylococcus aureus* endotoxin B gene sequence was adopted from GenBank (GenBank ID: M11118.1) and codon-optimized for expression in Sf9 insect cells.

| Fragment    | Position | Peptide Sequence     | PTM    | Site      | Theoretical mass [M+H] | Charge | Delta (ppm) | RT    | M/Z     | MS Area     |
|-------------|----------|----------------------|--------|-----------|------------------------|--------|-------------|-------|---------|-------------|
| Y1-2(NS)    | 1-12     | ESQPDPKPDELH         | NS     |           | 1391.644               | 3      | 2.66        | 12.14 | 464.554 | 24,217,622  |
| Y2(NS)      | 13-17    | KSSKF                | NS     |           | 596.340                | 2      | 0.84        | 1.87  | 298.674 | 34,659,652  |
| Y3-6        | 18-27    | TGLMENMKVL           | None   |           | 1135.585               | 2      | 1.50        | 31.67 | 568.297 | 37,597,436  |
| Y3-6(M)     | 18-27    | TGLMENMKVL           | M      | T18       | 1175.617               | 2      | 2.89        | 33.83 | 588.314 | 16,117,372  |
| Y5-6        | 22-27    | ENMKVL               | None   |           | 733.391                | 2      | 1.91        | 15.29 | 367.200 | 13,100,001  |
| Y7-8(NS)    | 28-37    | YDDNHVSAIN           | NS     |           | 1147.501               | 2      | 2.88        | 12.45 | 574.256 | 29,039,062  |
| Y7-8        | 28-44    | YDDNHVSAINVKSIDQF    | None   |           | 1964.935               | 3      | 3.36        | 30.61 | 655.652 | 33,441,698  |
| Y8(NS)      | 38-44    | VKSIDQF              | NS     |           | 836.451                | 2      | 1.79        | 16.65 | 418.730 | 30,767,858  |
| Y8-10(NS)   | 38-46    | VKSIDQFLY            | NS     |           | 1112.599               | 2      | 3.69        | 31.21 | 556.805 | 25,336,616  |
| Y9-11       | 45-47    | LYF                  | None   |           | 442.234                | 1      | 3.17        | 23.50 | 442.235 | 16,645,148  |
| Y11-13      | 47-51    | FDLIY                | None   |           | 670.345                | 1      | 2.09        | 32.66 | 670.346 | 24,525,138  |
| Y12-13      | 48-51    | DLIY                 | None   |           | 523.276                | 1      | 1.53        | 18.57 | 523.277 | 19,758,246  |
| Y14         | 52-58    | SIKDTKL              | None   |           | 804.483                | 2      | 2.73        | 12.02 | 402.746 | 12,433,139  |
| Y14-15      | 52-61    | SIKDTKLGNY           | None   |           | 1138.610               | 2      | 2.20        | 14.73 | 569.810 | 73,252,224  |
| Y16         | 62-68    | DNVRVEF              | None   |           | 878.437                | 2      | 2.39        | 19.95 | 439.723 | 104,406,336 |
| Y17-18      | 69-77    | KNKDLADKY            | None   |           | 1094.584               | 3      | 3.11        | 9.42  | 365.534 | 85,896,176  |
| Y19-20      | 78-85    | KDKYVDVF             | None   |           | 1013.530               | 2      | 2.47        | 20.75 | 507.270 | 111,304,856 |
| Y21-22      | 86-90    | GANYY                | None   |           | 587.246                | 1      | 1.70        | 11.83 | 587.247 | 12,877,764  |
| Y23-25      | 91-95    | YQCYF                | CAM    | C93       | 780.302                | 1      | -0.13       | 21.64 | 780.302 | 9,541,688   |
| Y26-27      | 96-115   | SKKTNDINSHQTDKRKTCMY | CAM    | C113      | 2455.182               | 5      | 3.75        | 10.93 | 491.844 | 34,181,940  |
| Y26-27(De)  | 96-115   | SKKTNDINSHQTDKRKTCMY | De,CAM | N103,C113 | 2456.166               | 5      | 2.12        | 11.23 | 492.040 | 7,379,775   |
| Y28-29      | 116-129  | GGVTEHNGNQLDKY       | None   |           | 1531.714               | 3      | 2.55        | 13.34 | 511.244 | 68,870,048  |
| Y28-29(De)  | 116-129  | GGVTEHNGNQLDKY       | De     | N122      | 1532.698               | 3      | 2.54        | 14.59 | 511.572 | 5,137,378   |
| Y28-29(M)   | 116-129  | GGVTEHNGNQLDKY       | M      | G116      | 1571.746               | 3      | 2.16        | 14.05 | 524.588 | 29,329,406  |
| Y30         | 130-137  | RSITVRVF             | None   |           | 977.589                | 2      | 1.74        | 22.23 | 489.299 | 55,246,604  |
| Y31-32      | 138-144  | EDGKNLL              | None   |           | 788.415                | 2      | 2.41        | 14.21 | 394.712 | 77,925,040  |
| Y33-34      | 145-149  | SFDVQ                | NS     |           | 595.272                | 1      | 1.34        | 12.88 | 595.273 | 13,992,765  |
| Y34(NS)     | 150-160  | TNKKKVTAQEL          | NS     |           | 1259.732               | 3      | 2.14        | 10.62 | 420.583 | 11,000,660  |
| Y34-36(NS1) | 150-163  | TNKKKVTAQELDYL       | NS     |           | 1650.906               | 3      | 2.60        | 21.20 | 550.975 | 70,340,248  |
| Y34-36(NS2) | 152-163  | KKKVTAQELDYL         | NS     |           | 1435.816               | 3      | 2.72        | 20.62 | 479.278 | 38,571,596  |
| Y37         | 164-167  | TRHY                 | None   |           | 576.289                | 2      | -0.35       | 1.46  | 288.648 | 4,777,218   |
| Y38-40      | 168-175  | LVKNKKLY             | None   |           | 1005.646               | 3      | 0.89        | 11.15 | 335.887 | 25,590,284  |
| Y39-40(NS)  | 172-175  | KKLY                 | NS     |           | 551.355                | 2      | -0.73       | 4.25  | 276.181 | 29,880,112  |
| Y41-42      | 176-182  | EFNNSPY              | None   |           | 870.363                | 2      | -0.11       | 14.30 | 435.685 | 18,013,278  |
| Y43         | 183-186  | ETGY                 | None   |           | 469.193                | 1      | 2.34        | 2.82  | 469.194 | 17,507,296  |
| Y44         | 187-189  | IKF                  | None   |           | 407.265                | 2      | 3.44        | 14.35 | 204.137 | 26,454,452  |
| Y44-46      | 187-197  | IKFIENENSF           | None   |           | 1426.700               | 2      | 3.22        | 37.53 | 713.856 | 25,004,654  |
| Y45-46      | 190-197  | IENENSF              | None   |           | 1038.453               | 2      | 1.93        | 27.28 | 519.731 | 20,288,518  |
| Y47-49      | 198-208  | YDMMPAPGDKF          | None   |           | 1271.544               | 2      | 2.52        | 27.43 | 636.277 | 45,058,888  |
| Y48-49      | 199-208  | DMMPAPGDKF           | None   |           | 1108.480               | 2      | 4.15        | 23.03 | 554.746 | 36,833,020  |
| Y50         | 209-213  | DQSKY                | None   |           | 640.294                | 1      | 0.47        | 1.89  | 640.294 | 13,860,602  |
| Y51-54      | 214-217  | LMMY                 | None   |           | 557.246                | 1      | 1.44        | 20.16 | 557.247 | 36,545,736  |
| Y55-56      | 218-233  | NDNKMVDSKDVKIEVY     | None   |           | 1896.937               | 3      | 3.32        | 21.67 | 632.986 | 164,906,176 |
| Y57-58(NS)  | 234-237  | LTTK                 | NS     |           | 462.292                | 1      | -0.43       | 1.44  | 462.292 | 1,755,542   |
| Y57-58      | 234-239  | LTTKKK               | None   |           | 718.482                | 2      | 0.84        | 1.35  | 359.745 | 402,603     |
| T59         | 240-245  | HHHHHH               | NS     |           | 841.371                | 3      | 1.31        | 1.07  | 281.129 | 344,239     |
| T59(NS1)    | 240-244  | HHHHH                | NS     |           | 704.312                | 3      | -1.42       | 1.07  | 235.442 | 7,858,221   |
| T59(NS2)    | 240-243  | HHHH                 | NS     |           | 567.254                | 2      | -1.41       | 1.08  | 284.130 | 2,757,905   |

Y : Chymotryptic Peptide, CAM : Carbamidomethylation, NS : Nonspecific, De : Deamidation, M : Modification

**Figure S2. Peptide mapping results analyzed by LC-MS/MS.**

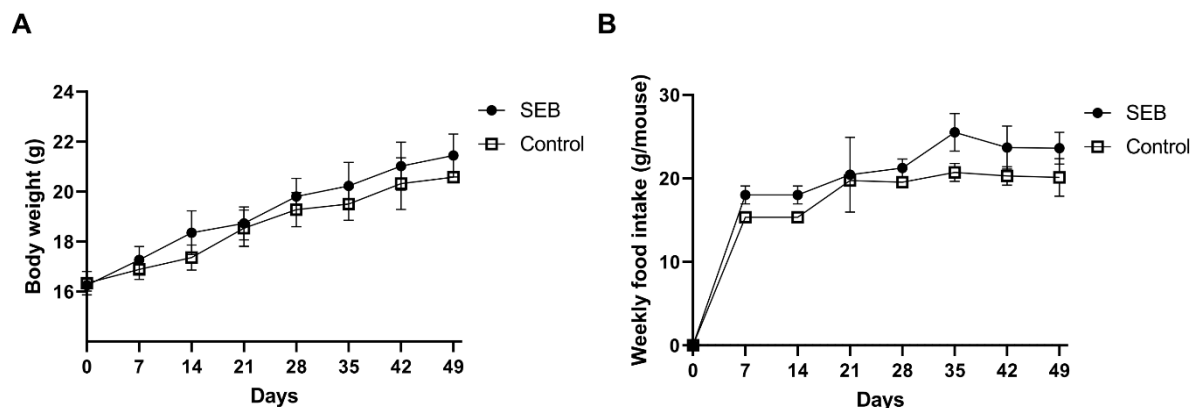

**Figure S3. Assessment of body weight and food intake from SEB-immunized mice. Mice**

were primarily immunized with rSEB-BEVS (*SEB*) or phosphate-buffered saline (*Control*) on day 0 and boosted on days 14, 28, 42, and 45. A) Body weight and B) food intake were monitored during the immunization.

## Supplementary Tables

**Table S1. Linear regression analysis and LoD calculation to compare the detectability of SEB by different pairs of mAbs**

|                             | <b>2-8G+11-7E</b>       | <b>11-7E+2-8G</b>        | <b>117E+4-7A</b>        | <b>4-7A+11-7E</b>       |
|-----------------------------|-------------------------|--------------------------|-------------------------|-------------------------|
| <b>Equation</b>             | $Y = 0.1539X + 0.04891$ | $Y = 0.1848X + 0.007183$ | $Y = 0.08893X + 0.1218$ | $Y = 0.1049X + 0.06180$ |
| <b>Linear range (ng/mL)</b> | 0.27 - 2.00             | 0.23 - 2.00              | 0.54 - 2.00             | 0.36 - 2.00             |
| <b>Slope</b>                | 0.1539                  | 0.1848                   | 0.08893                 | 0.1049                  |
| <b>Y-intercept</b>          | 0.04891                 | 0.007183                 | 0.1218                  | 0.0618                  |
| <b>R<sup>2</sup></b>        | 0.9587                  | 0.9645                   | 0.9044                  | 0.8767                  |
| <b>LoD (ng/mL)</b>          | 0.41                    | 0.38                     | 0.64                    | 0.74                    |

**Table S2. Linear regression analysis to compare the detectability of rSEB-BEVS or wtSEB-SA using our immunodetection method and commercial kits**

|              |                 | <b>11-7E+2-8G</b> | <b>Chondrex</b>  | <b>IBT<br/>Bioservices</b> | <b>Tetracore</b> |
|--------------|-----------------|-------------------|------------------|----------------------------|------------------|
| <b>rSEB-</b> | <b>Equation</b> | $Y = 0.1734X +$   | $Y = 0.07880X +$ | $Y = 0.01439X +$           | $Y = 0.04843X +$ |

|                      |                                 |                          |                           |                          |                          |
|----------------------|---------------------------------|--------------------------|---------------------------|--------------------------|--------------------------|
| <b>BEVS</b>          |                                 | 0.06421                  | 0.07104                   | 0.09877                  | 0.06247                  |
|                      | <b>Linear range<br/>(ng/mL)</b> | 0.20 - 5.00              | 0.18 - 5.00               | 1.48 - 5.00              | 0.73 - 5.00              |
|                      | <b>Slope</b>                    | 0.1734                   | 0.0788                    | 0.01439                  | 0.04843                  |
|                      | <b>Y-intercept</b>              | 0.06421                  | 0.07104                   | 0.09877                  | 0.06247                  |
|                      | <b>R<sup>2</sup></b>            | 0.9763                   | 0.9773                    | 0.5669                   | 0.8599                   |
|                      | <b>LoD (ng/mL)</b>              | 0.53                     | 0.49                      | 1.82                     | 1.6                      |
| <b>wtSEB-<br/>SA</b> | <b>Equation</b>                 | Y = 0.2573X +<br>0.06262 | Y = 0.09819X +<br>0.06625 | Y = 0.02301X +<br>0.1171 | Y = 0.06093X +<br>0.1712 |
|                      | <b>Linear range<br/>(ng/mL)</b> | 0.21 - 5.00              | 0.18 - 5.00               | 0.99 - 5.00              | 0.31 - 5.00              |
|                      | <b>Slope</b>                    | 0.2573                   | 0.09819                   | 0.02301                  | 0.06093                  |
|                      | <b>Y-intercept</b>              | 0.06262                  | 0.06625                   | 0.1171                   | 0.1712                   |
|                      | <b>R<sup>2</sup></b>            | 0.9851                   | 0.9875                    | 0.5429                   | 0.862                    |
|                      | <b>LoD (ng/mL)</b>              | 0.40                     | 0.36                      | 1.91                     | 0.83                     |

**Table S3. Linear regression analysis to compare the detectability of rSEB-BEVS spiked in food matrices and human serum using the immunodetection assay**

|  |            |                    |             |                  |                        |
|--|------------|--------------------|-------------|------------------|------------------------|
|  | <b>PBS</b> | <b>Apple juice</b> | <b>Milk</b> | <b>Skim milk</b> | <b>Human<br/>serum</b> |
|--|------------|--------------------|-------------|------------------|------------------------|

|                        |                          |                          |                          |                          |                            |
|------------------------|--------------------------|--------------------------|--------------------------|--------------------------|----------------------------|
| <b>Equation</b>        | Y = 0.05949X +<br>0.1697 | Y = 0.06579X +<br>0.1758 | Y = 0.1046*X +<br>0.1980 | Y = 0.09682X +<br>0.2857 | Y = 0.09473X -<br>0.005103 |
| <b>Slope</b>           | 0.05949                  | 0.06579                  | 0.1046                   | 0.09682                  | 0.09473                    |
| <b>Y-intercept</b>     | 0.1697                   | 0.1758                   | 0.1980                   | 0.2857                   | -0.005103                  |
| <b>R<sup>2</sup></b>   | 0.9953                   | 0.9945                   | 0.996                    | 0.992                    | 0.9818                     |
| <b>LoD<br/>(ng/mL)</b> | 0.61                     | 0.80                     | 0.68                     | 0.85                     | 1.21                       |
